# Supplementary material
Source: PubMed Central journal article supplement (PMC3880866)
Supplement: NIHMS55978-supplement-Supplementary.pdf [file NIHMS55978-supplement-Supplementary.pdf]

## Supplementary Material

### Structure of BIRC7–E2 ubiquitin conjugate reveals the mechanism of ubiquitin transfer by a RING dimer

Hao Dou, Lori Buetow, Gary J. Sibbet, Kenneth Cameron and Danny T. Huang

#### Table of Contents

| Item                                                                                                                                       | Page  |
|--------------------------------------------------------------------------------------------------------------------------------------------|-------|
| Supplementary Figure 1. Surface plasmon resonance analyses of UbcH5B and UbcH5B <sub>S</sub> ~Ub variants binding to dimeric RING variants | 2-3   |
| Supplementary Figure 2. Additional <i>in vitro</i> ubiquitination assays                                                                   | 4-5   |
| Supplementary Figure 3. Similar E2–Ubl tail interactions                                                                                   | 6     |
| Supplementary Figure 4. BIRC7 dimerization                                                                                                 | 7     |
| Supplementary Figure 5. Mapping of Ub interactions by NMR                                                                                  | 8-10  |
| Supplementary Figure 6. Effects of BIRC3, UbcH5B and Ub mutations on ubiquitination activity.                                              | 11    |
| Supplementary Figure 7. Models of dimeric E3–UbcH5B~Ub complexes                                                                           | 12    |
| <b>Supplementary Methods</b>                                                                                                               |       |
| Protein preparation                                                                                                                        | 13-14 |
| Structural determination                                                                                                                   | 14    |
| Single turnover kinetics of di-Ub formation                                                                                                | 15    |
| <b>Supplementary References</b>                                                                                                            |       |
|                                                                                                                                            | 16    |

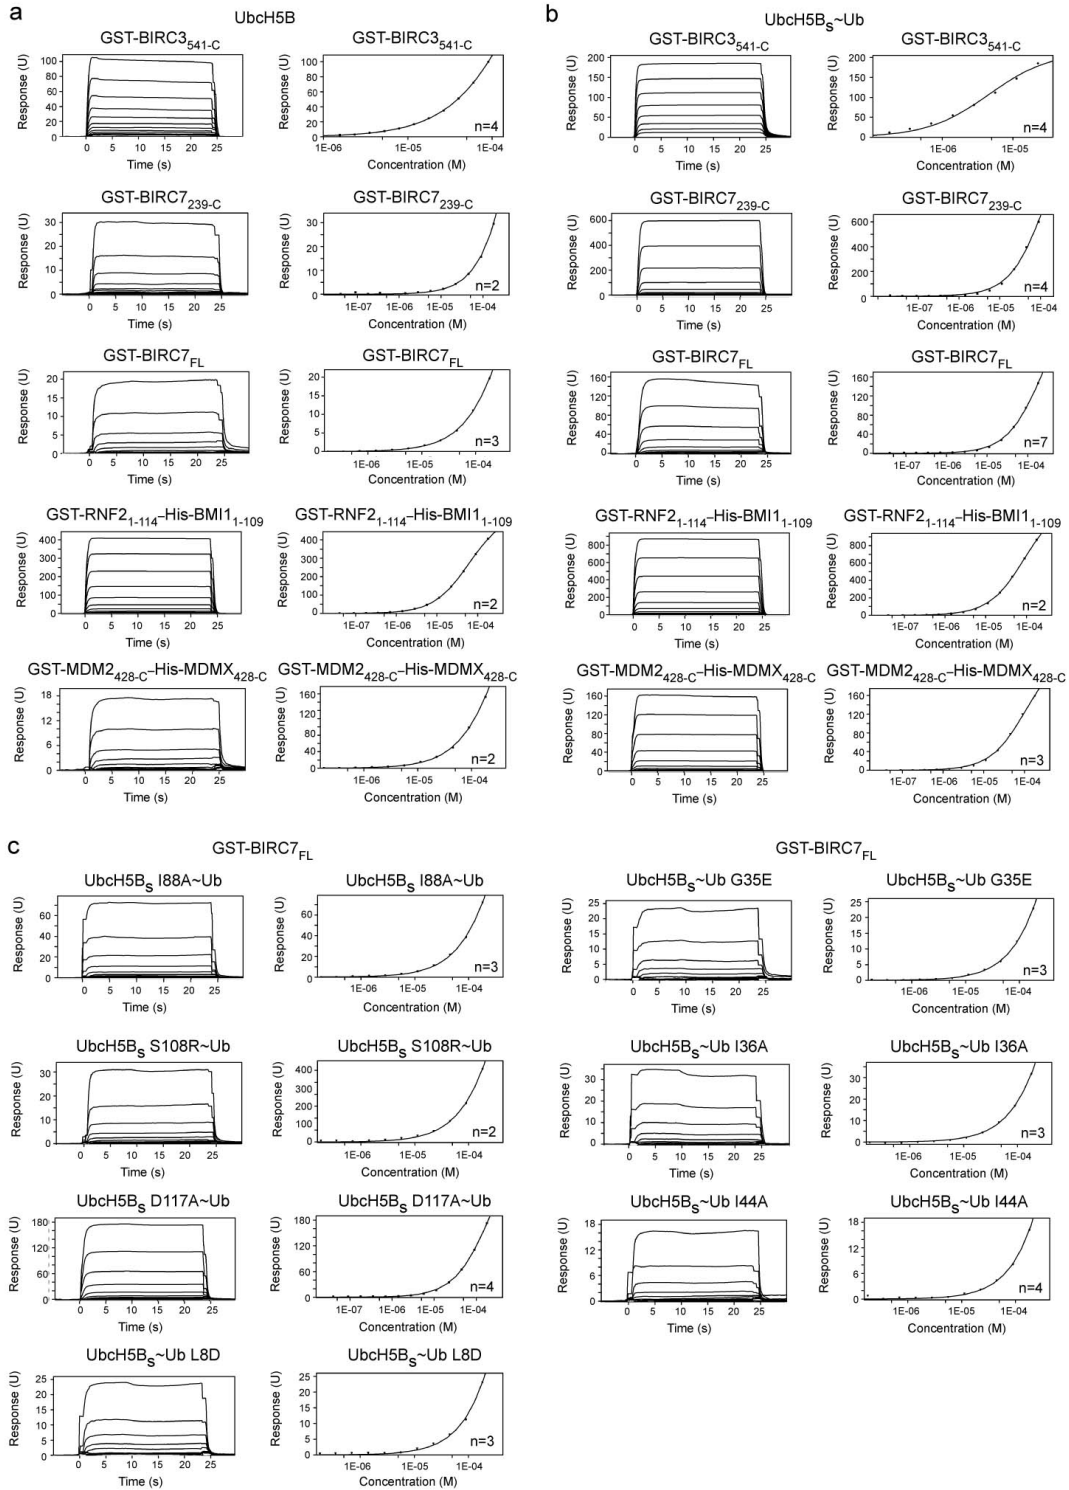

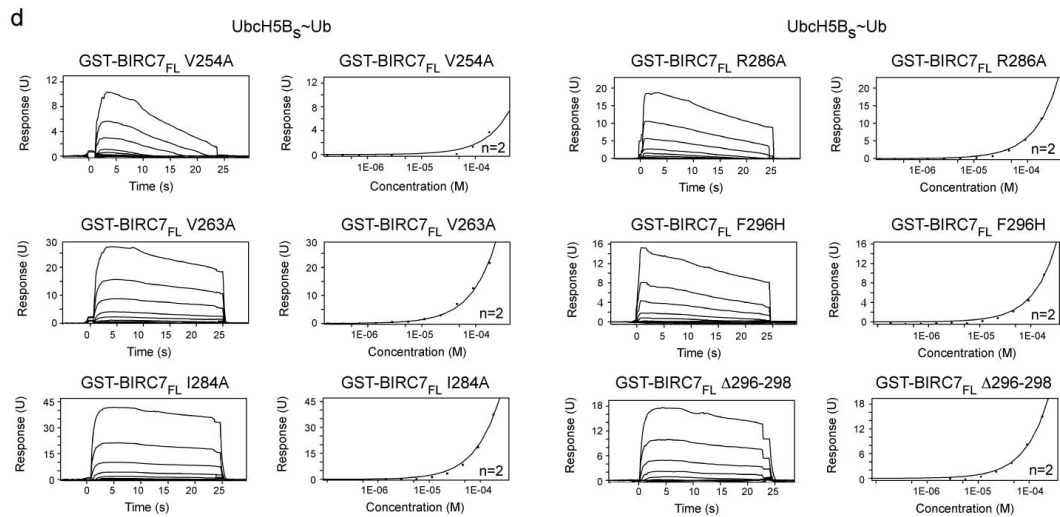

**Supplementary Figure 1** Surface plasmon resonance analyses of UbchH5B and UbchH5B<sub>S</sub>~Ub variants binding to dimeric RING variants. Representative sensorgrams (left) and binding curves (right) for GST-RING E3 variants with UbchH5B (**a**), UbchH5B<sub>S</sub>~Ub (**b**), GST-BIRC7<sub>FL</sub> with UbchH5B<sub>S</sub>~Ub variants (**c**), GST-BIRC7<sub>FL</sub> variants with UbchH5B<sub>S</sub>~Ub (**d**), as indicated. GST-ligands and analytes are indicated above the sensorgrams and binding curves. The number of replicates is indicated in the binding curve.

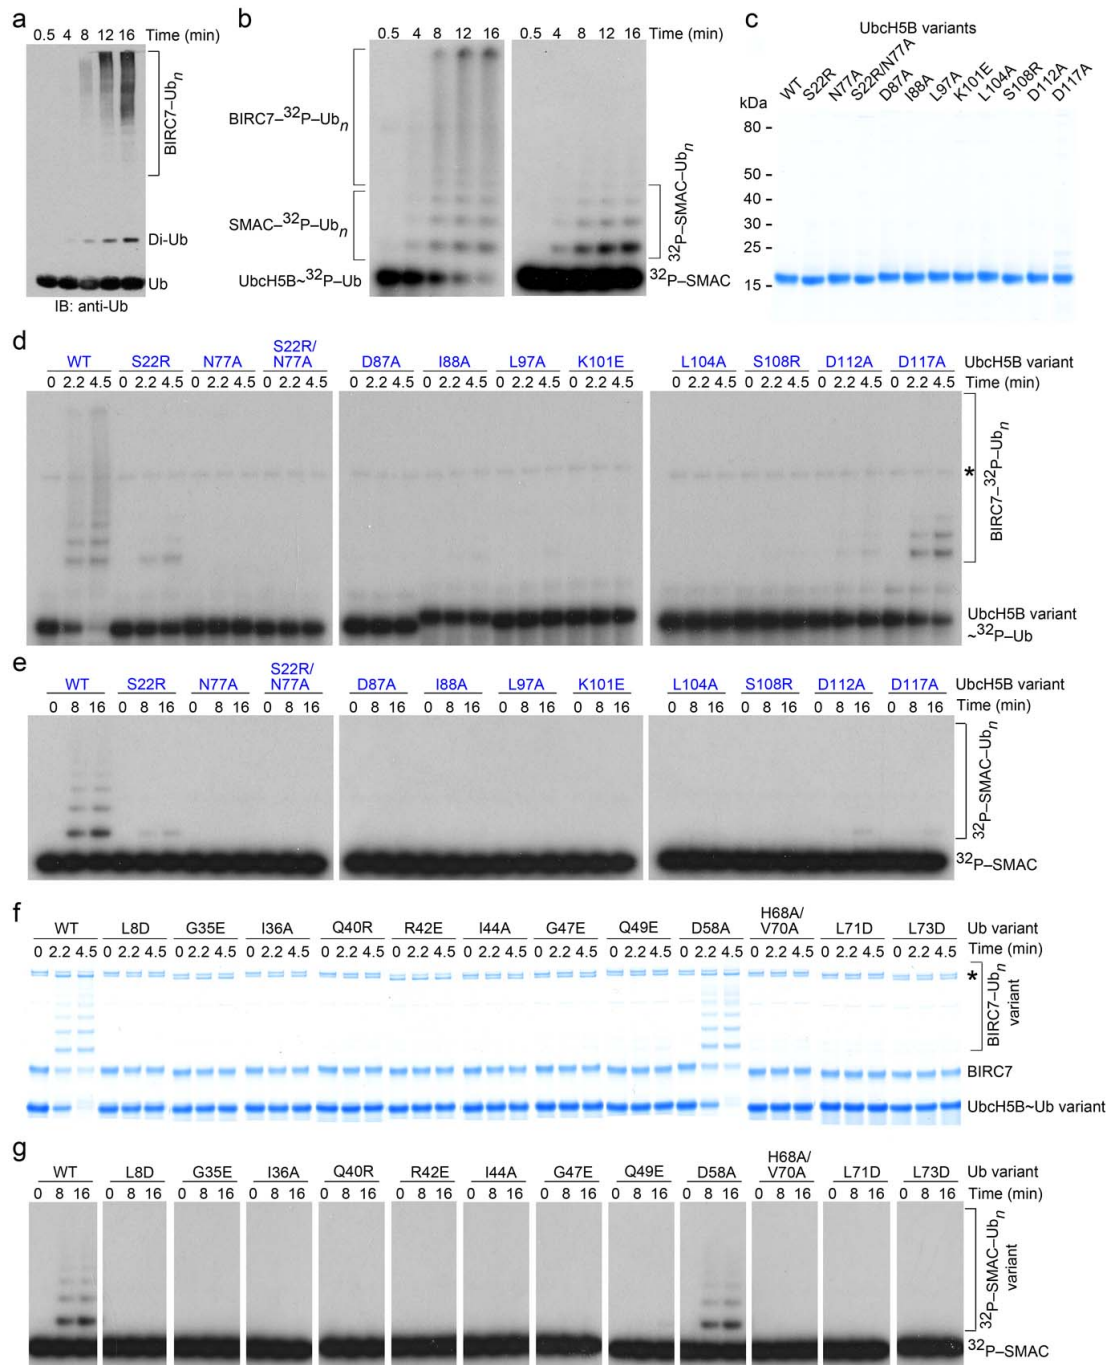

**Supplementary Figure 2** Additional *in vitro* ubiquitination assays. (a)

Autoubiquitination of BIRC7 occurs in di-Ub formation assays. Western blot from *in vitro* di-Ub formation assay with wild-type BIRC7, UbcH5B and Ub under pulse-chase conditions. (b) Autoubiquitination of BIRC7 occurs in SMAC-ubiquitination assays. Ub<sub>n</sub>, Ub chain of length *n*. Left: Non-reduced autoradiogram of SMAC ubiquitination showing the simultaneous disappearance of UbcH5B~<sup>32</sup>P-Ub and the formation of BIRC7-Ub<sub>n</sub> and SMAC-Ub<sub>n</sub> over time with wild-type UbcH5B, BIRC7 and <sup>32</sup>P-Ub under pulse-chase conditions. Right: Non-reduced autoradiogram showing

the formation of  $^{32}\text{P}$ -SMAC-Ub<sub>n</sub> over time run under conditions identical to those in the left panel but with  $^{32}\text{P}$ -SMAC and unlabeled Ub. (c) SDS-PAGE showing 2  $\mu\text{g}$  of purified UbcH5B variants. Molecular weight standard is indicated. (d) Non-reduced autoradiograms of pulse-chase reactions showing the simultaneous formation of  $^{32}\text{P}$ -Ub products and disappearance of UbcH5B~ $^{32}\text{P}$ -Ub with full-length BIRC7 and UbcH5B variants over time. An asterisk indicates the E1~Ub band. (e) Non-reduced autoradiogram showing the formation of  $^{32}\text{P}$ -SMAC-Ub<sub>n</sub> over time as in **b** but with UbcH5B variants. (f) Non-reduced SDS-PAGE of pulse-chase reactions showing the simultaneous formation of  $^{32}\text{P}$ -Ub products and disappearance of UbcH5B~ $^{32}\text{P}$ -Ub with full-length BIRC7, UbcH5B and Ub variants over time. (g) Non-reduced autoradiogram showing the formation of  $^{32}\text{P}$ -SMAC-Ub<sub>n</sub> over time as in **b** but with Ub variants.

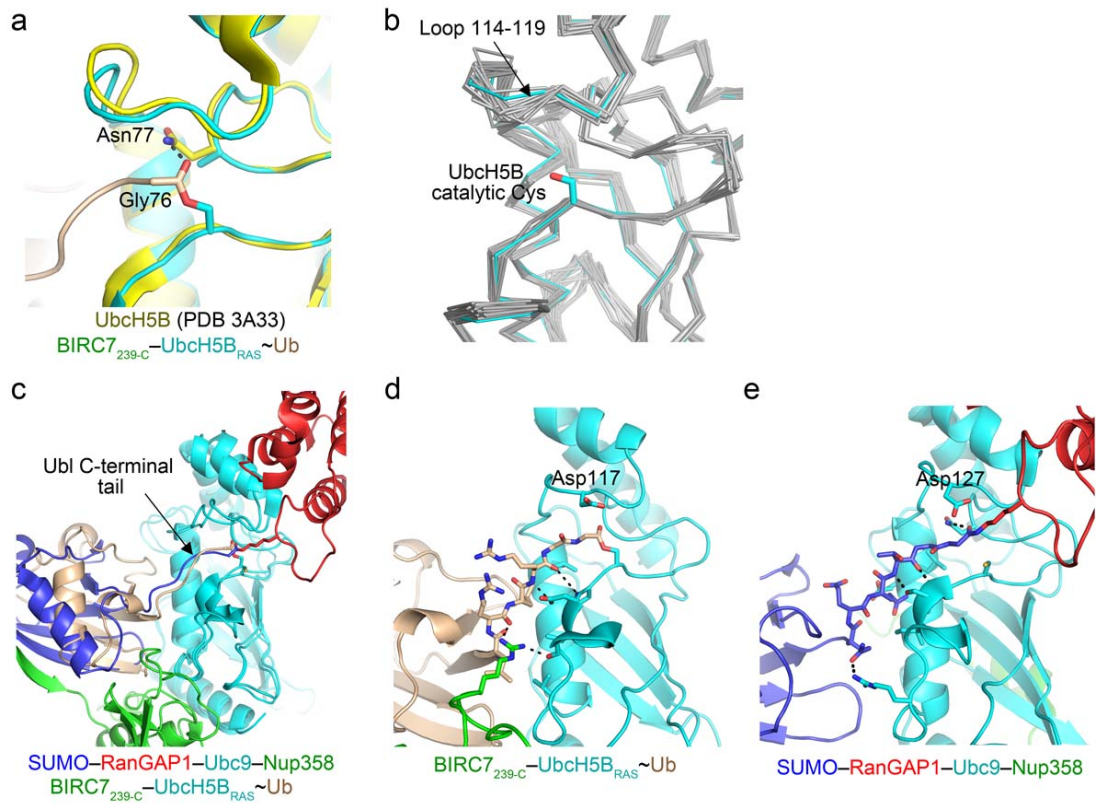

**Supplementary Figure 3** E2-Ub tail interactions. **(a)** Close-up view of the active site from a structural alignment of UbcH5B from PDB 3A33 (colored yellow) and BIRC7<sub>239-C</sub>-UbcH5B<sub>RAS</sub>-Ub (colored cyan). Gly76 and N77A from BIRC7<sub>239-C</sub>-UbcH5B<sub>RAS</sub>-Ub and Asn77 from PDB 3A33 are shown as sticks. **(b)** Movement of UbcH5B loop (114-119). Ribbon diagrams of structural alignments of the C $\alpha$  atoms of UbcH5B from BIRC7<sub>239-C</sub>-UbcH5B<sub>RAS</sub>-Ub (colored cyan) with available structures of UbcH5B variants (conjugated and unconjugated) from the Protein Data Bank in grey. The catalytic Cys is shown in sticks. **(c-e)** Similar E2-Ubl tail interactions. **(c)** Structural alignment of UbcH5B from our structure with Ubc9 in the post-conjugation SUMO-RanGAP1-Ubc9-Nup358 complex structure (PDB 1Z5S<sup>1</sup>). E2s are colored cyan, E3s green, Ub wheat, SUMO blue, and RanGAP1 red. **(d)** Close-up view of the Ub tail-UbcH5B interactions in BIRC7<sub>239-C</sub>-UbcH5B<sub>RAS</sub>-Ub. **(e)** Close-up view of the SUMO tail-Ubc9 interactions in SUMO-RanGAP1-Ubc9-Nup358. For **d** and **e**, atoms are colored as in **Fig. 2**.

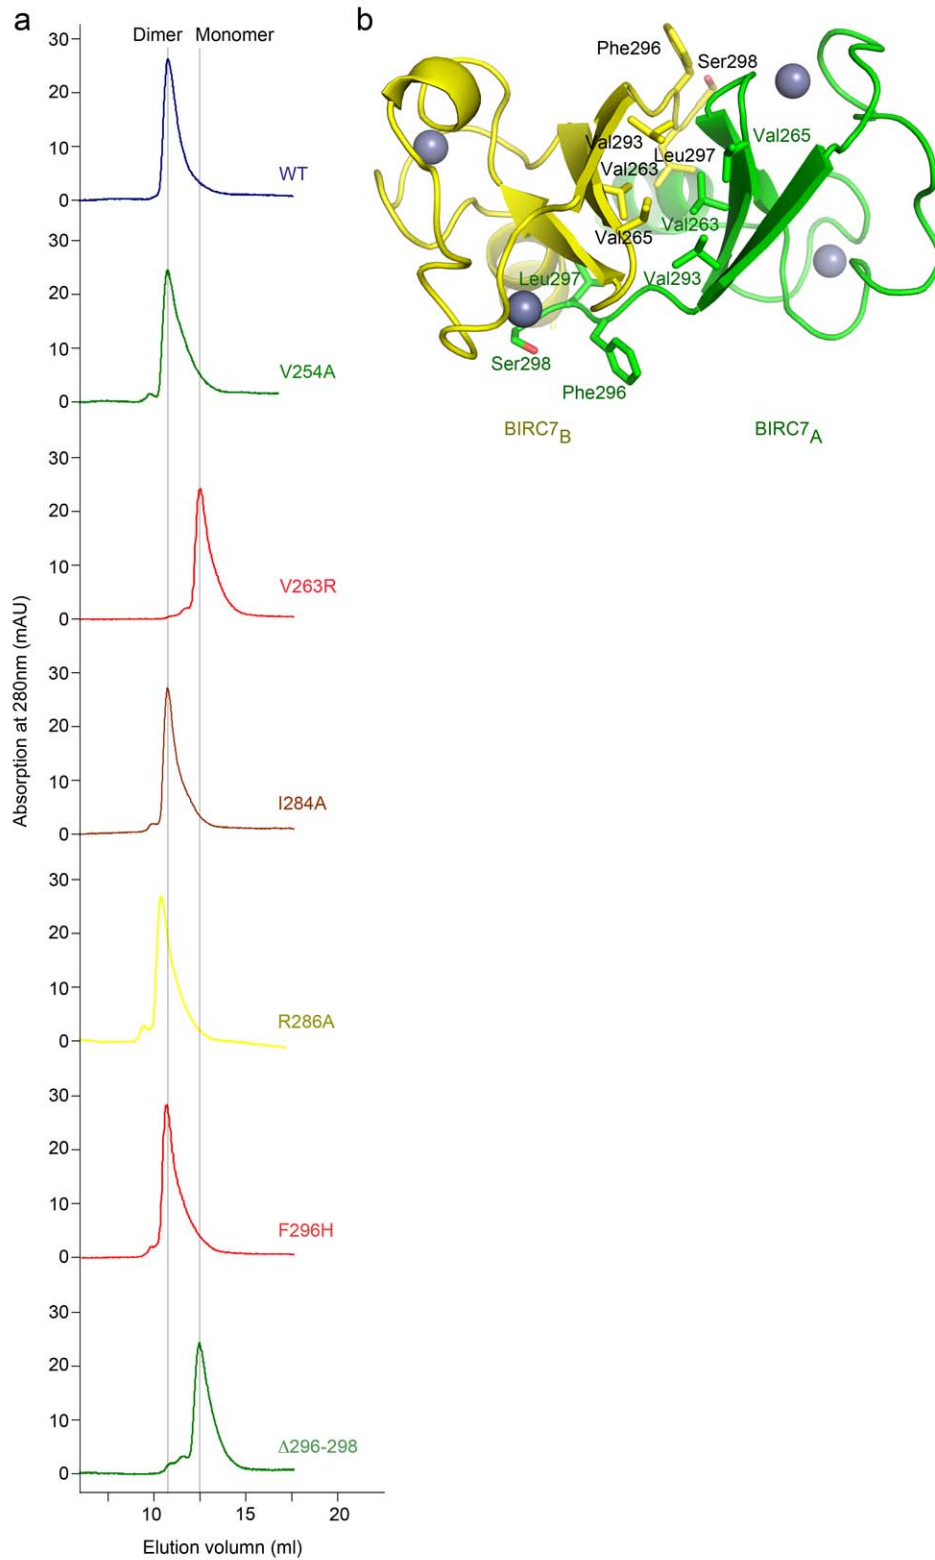

**Supplementary Figure 4** BIRC7 dimerization. **(a)** Gel filtration chromatograms of full-length BIRC7 variants. Purified BIRC7 variants (120  $\mu$ g) were passed over an analytical Superdex 75 10/300 (GE Healthcare). **(b)** Close-up view of the BIRC7 RING-RING dimerization interface in BIRC7<sub>239-C</sub>-Ub<sub>ch5B</sub>-Ub complex.

a

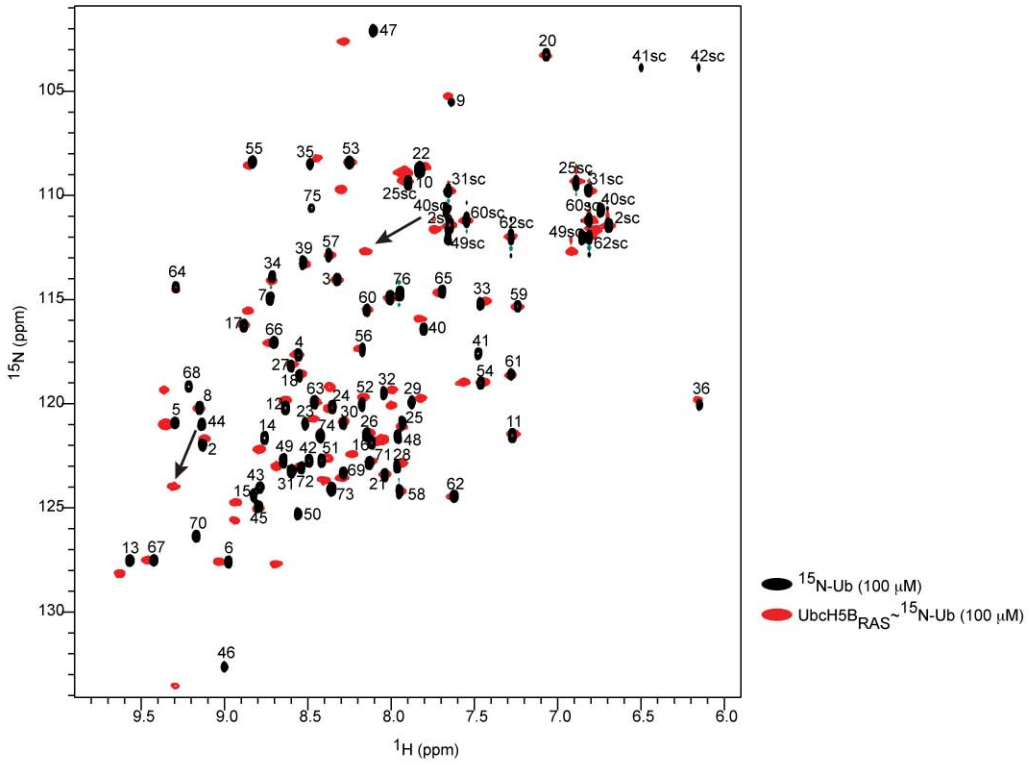

b

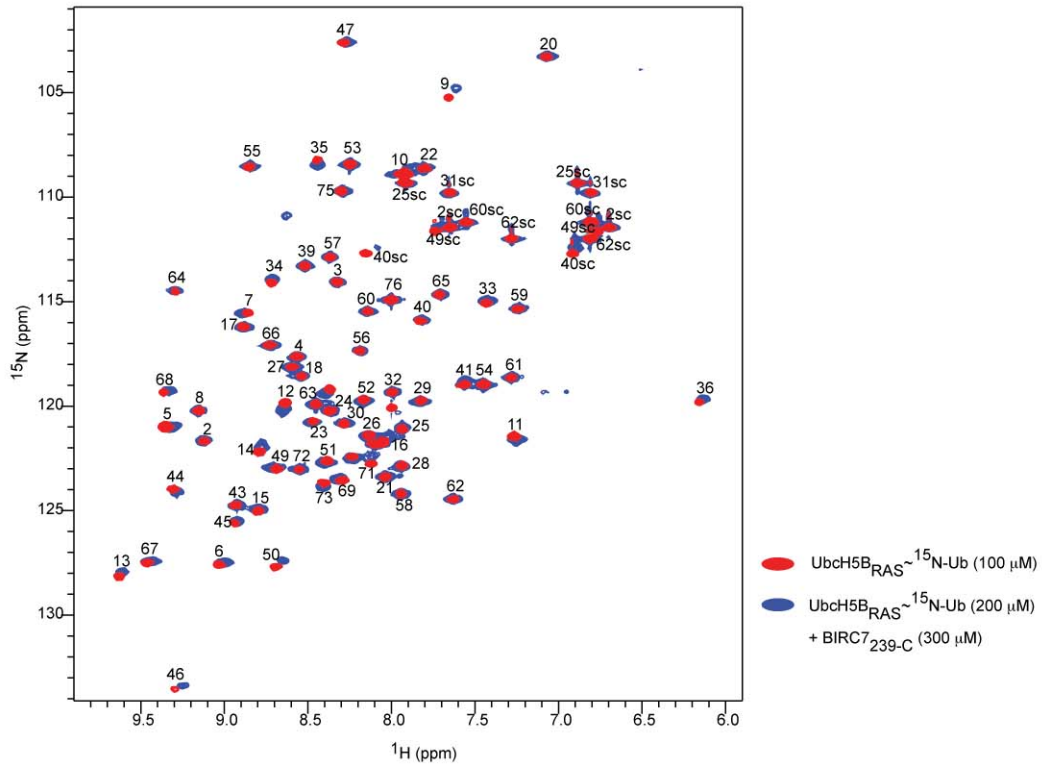



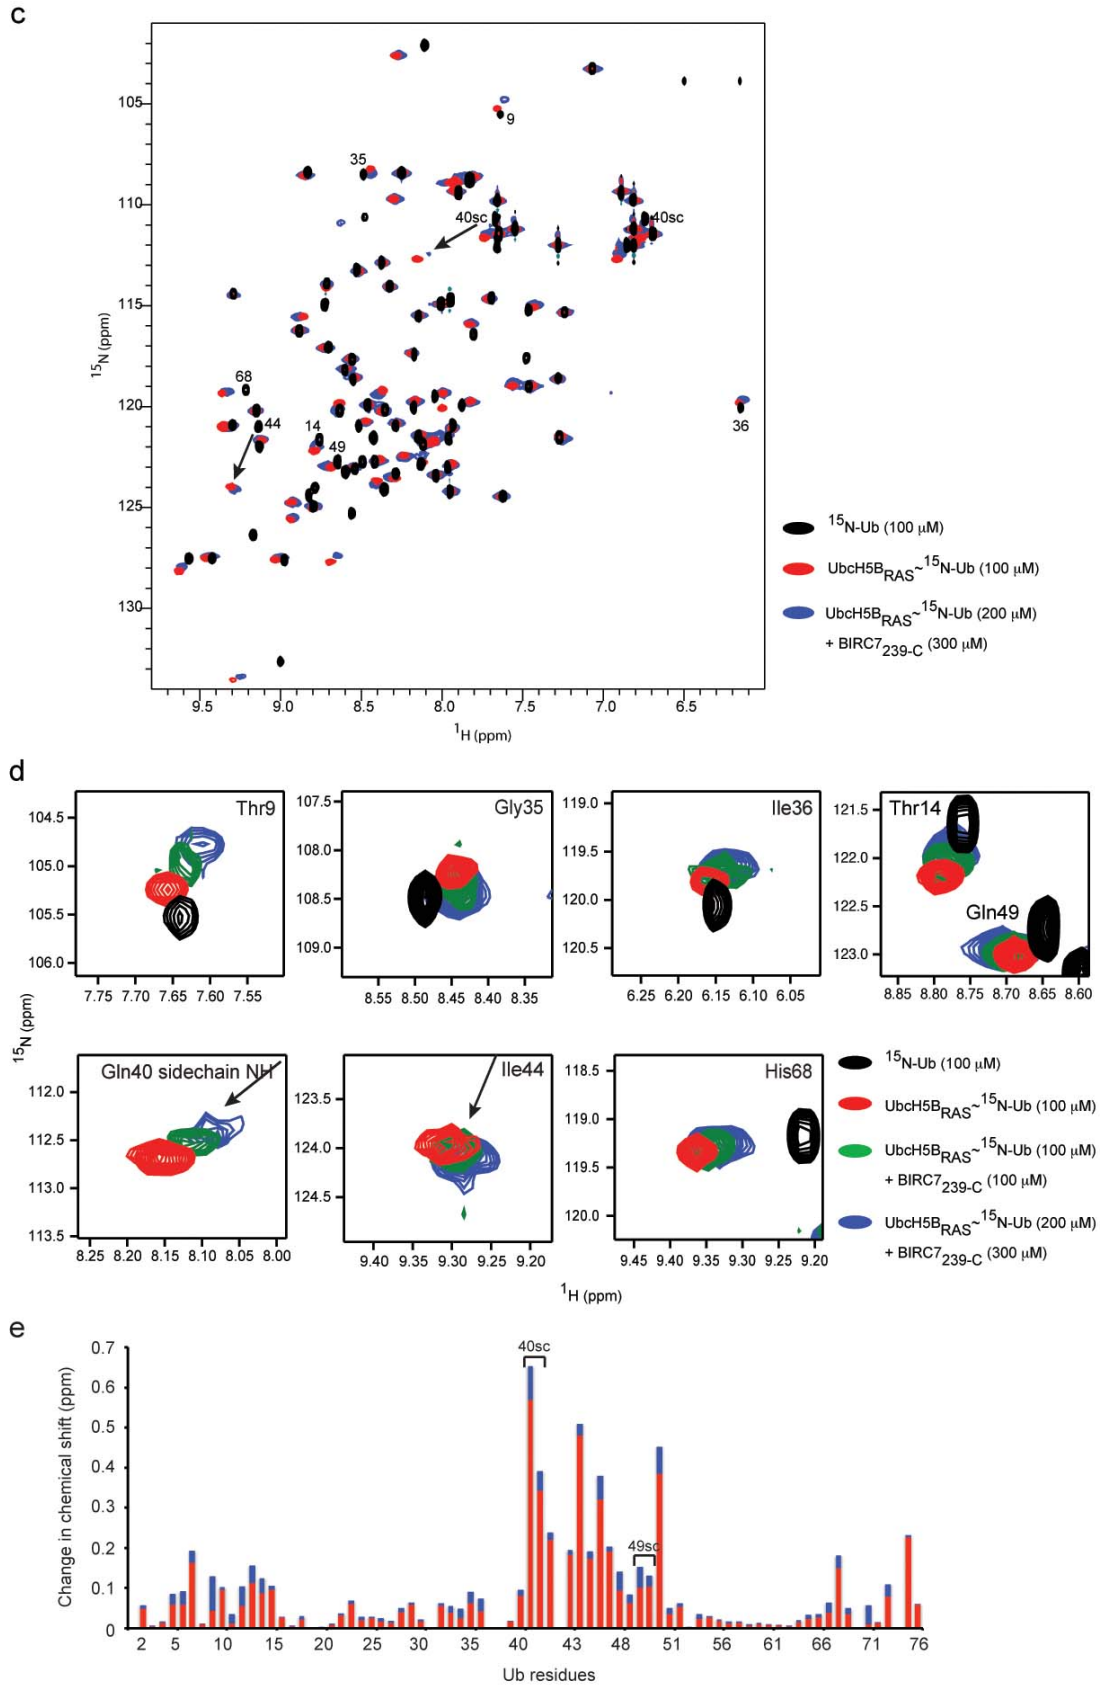

**Supplementary Figure 5** Mapping of Ub interactions by NMR. (a) Chemical shift perturbation data for Ub in UbcH5B<sub>RAS</sub>~Ub interactions. <sup>1</sup>H-<sup>15</sup>N HSQC spectra for

$^{15}\text{N}$ -Ub alone (black) and in the covalent  $\text{UbcH5B}_{\text{RAS}}\sim^{15}\text{N}$ -Ub complex (red). Numbers indicate Ub residues in  $^{15}\text{N}$ -Ub alone. **(b)** Chemical shift perturbation data for Ub in BIRC7–UbcH5B~Ub interactions.  $^1\text{H}$ – $^{15}\text{N}$ -HSQC spectra for  $\text{UbcH5B}_{\text{RAS}}\sim^{15}\text{N}$ -Ub in the absence (red) and presence (blue) of BIRC7<sub>239-C</sub>. Numbers indicate Ub residues in  $\text{UbcH5B}_{\text{RAS}}\sim^{15}\text{N}$ -Ub complex. **(c)**  $^1\text{H}$ – $^{15}\text{N}$ -HSQC spectra for  $^{15}\text{N}$ -Ub alone (black),  $\text{UbcH5B}_{\text{RAS}}\sim^{15}\text{N}$ -Ub (red) and  $\text{UbcH5B}_{\text{RAS}}\sim^{15}\text{N}$ -Ub in the presence of BIRC7<sub>239-C</sub> (blue). **(d)** Expanded regions of the  $^1\text{H}$ – $^{15}\text{N}$  HSQC spectra for Ub alone (100  $\mu\text{M}$ , black), in the covalent  $\text{UbcH5B}_{\text{RAS}}\sim\text{Ub}$  complex (100  $\mu\text{M}$ , red), and in the covalent  $\text{UbcH5B}_{\text{RAS}}\sim\text{Ub}$  complex (100  $\mu\text{M}$ ) with BIRC7<sub>239-C</sub> (100  $\mu\text{M}$ , green) and in the covalent  $\text{UbcH5B}_{\text{RAS}}\sim\text{Ub}$  complex (200  $\mu\text{M}$ ) with BIRC7<sub>239-C</sub> (300  $\mu\text{M}$ , blue). **(e)** Changes in chemical shift per residue of  $^{15}\text{N}$ -Ub following covalent linkage to  $\text{UbcH5B}_{\text{RAS}}$  (red) and subsequent addition of 1.5-fold molar excess of BIRC7<sub>239-C</sub> (blue) determined by  $^1\text{H}$ – $^{15}\text{N}$  HSQC NMR. Changes were calculated according to the equation  $[(0.15 \delta_{\text{N}})^2 + \delta_{\text{H}}^2]^{1/2}$ . sc indicates a perturbation in a sidechain NH group. Arrows indicate shift in peaks.

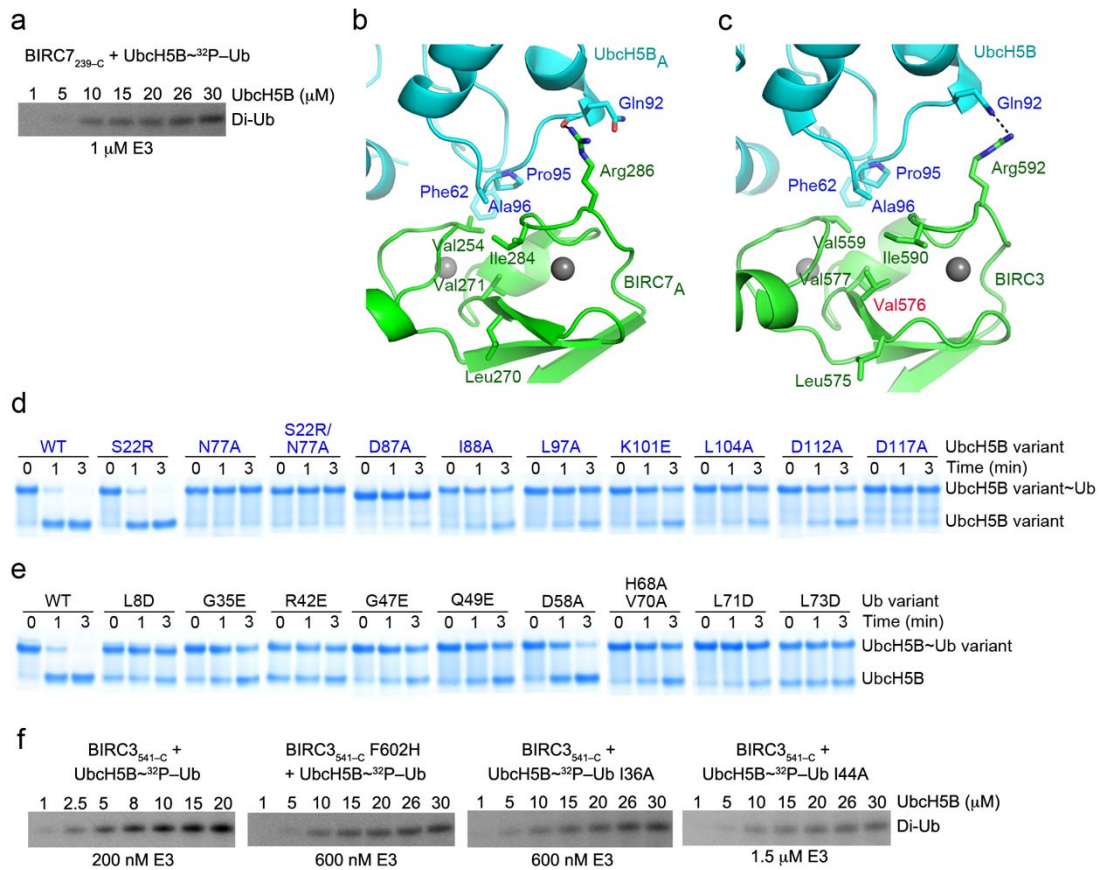

**Supplementary Figure 6** Effects of BIRC3, UbcH5B and Ub mutations on ubiquitination activity. **(a)** Single turnover kinetics of di-Ub formation catalyzed by BIRC7<sub>239-C</sub>. UbcH5B was charged with <sup>32</sup>P-Ub followed by addition of apyrase and EDTA to stop E1-catalyzed reaction. Various UbcH5B~<sup>32</sup>P-Ub concentrations were chased with a molar excess of His-Ub in the presence of BIRC7<sub>239-C</sub>. A representative reduced autoradiogram of di-Ub formation is shown. **(b)** Close-up of BIRC7<sub>A</sub>-UbcH5B<sub>A</sub> interactions. **(c)** Close-up of BIRC3-UbcH5B interactions in PDB 3EB6<sup>2</sup>. **b,c** are colored as in **Figs. 1** and **2**. **(d)** Non-reduced SDS-PAGE of pulse-chase reactions showing the disappearance of UbcH5B~Ub with BIRC3<sub>541-C</sub>, L-lysine, and UbcH5B variants over time. **(e)** As in **d** but with Ub variants. **(f)** Single turnover kinetics of di-Ub formation catalyzed by BIRC3<sub>239-C</sub>, UbcH5B and Ub variants. Reactions were performed as in **a**. Representative reduced autoradiograms of di-Ub formation are shown. Final UbcH5B and E3 concentrations are indicated in **a** and **f**.

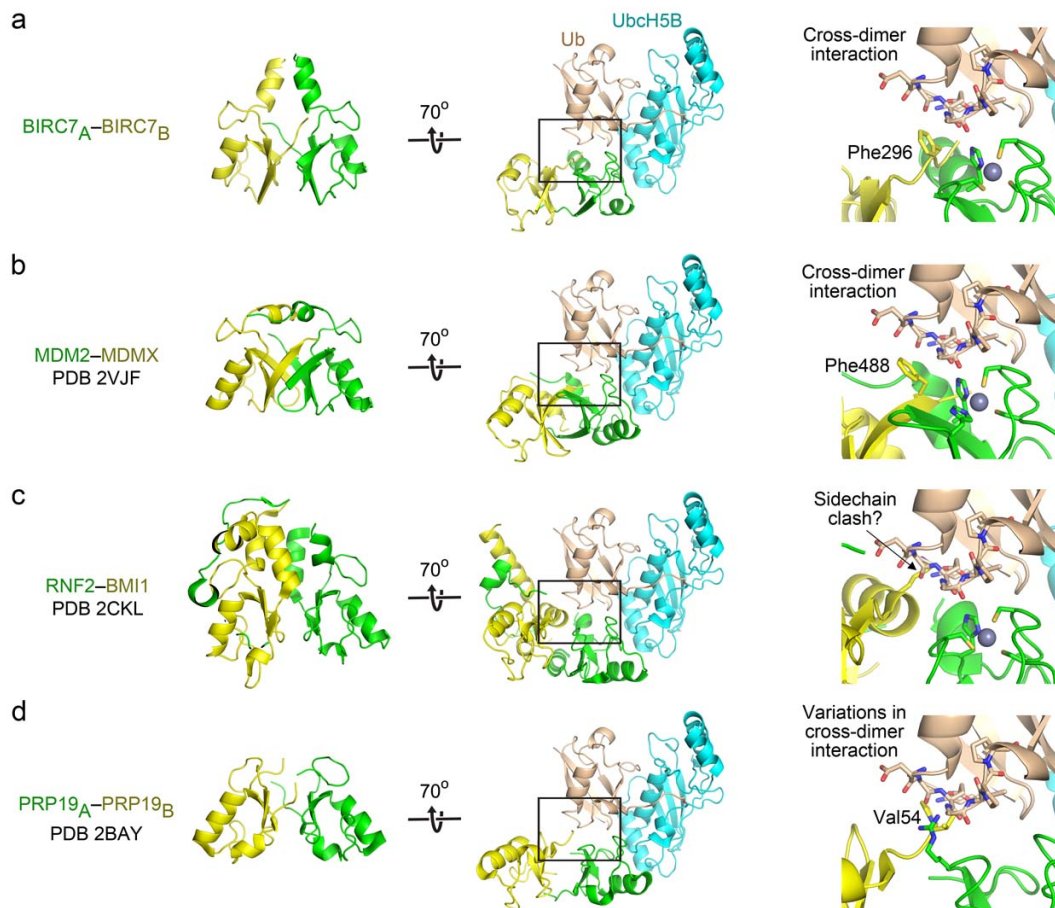

**Supplementary Figure 7** Models of dimeric E3-UbcH5B~Ub complexes. **(a)** Left: BIRC7 dimer portion from BIRC7<sub>239-C</sub>-UbcH5B<sub>RAS</sub>~Ub. Middle: BIRC7 dimer-UbcH5B<sub>A</sub>~Ub<sub>A</sub> from BIRC7<sub>239-C</sub>-UbcH5B<sub>RAS</sub>~Ub, rotated 70° from view on left. Right: Close-up view of cross-dimer interactions with Ub from boxed area in middle panel with key residues shown as sticks. **(b-d)** Left: Cartoon representations of E3 dimers generated by structural alignment with the BIRC7 dimer. One subunit is colored green and the second yellow. Middle: Models of UbcH5B~Ub bound to E3 dimers. The green subunits were superimposed onto BIRC7<sub>A</sub> to generate these models. Right: Close-up view of E3 dimer interactions with Ub from boxed area of models in the middle panel with key residues shown as sticks. Coloring is as described in **Figs. 1 and 2**.

## Supplementary Methods

### Protein preparation

Constructs were generated by standard PCR-ligation techniques and sequences verified by automated sequencing. All proteins are from human unless specified. BIRC3<sub>541-C</sub> variants, BIRC7<sub>239-C</sub>, full-length BIRC7 variants, RNF2<sub>1-114</sub> and MDM2<sub>428-C</sub> were cloned into pGEX4T1 (GE Healthcare) which contains an N-terminal glutathione S-transferase (GST) tag followed by a TEV protease cleavage site. BMI1<sub>1-109</sub> and MDMX<sub>428-C</sub> were cloned into pRSF\_DUET (Novagen) which contains an N-terminal His-tag followed by a TEV protease cleavage site. Untagged UbcH5B variants were cloned into pRSF\_1b vector. Proteins were expressed in *E. coli* BL21 (DE3) Gold. For crystallization, BIRC7<sub>239-C</sub> was purified by glutathione-affinity chromatography, treated with TEV protease to cleave the GST-tag, and further purified by desalting/glutathione-affinity pass-back and size exclusion chromatography. For ubiquitination assays, BIRC3 and BIRC7 variants were expressed and purified as described previously except cleavage was performed on glutathione sepharose beads and the pass-back step omitted. For Biacore analyses, GST-tagged BIRC3<sub>541-C</sub>, BIRC7<sub>239-C</sub>, full-length BIRC7 variants were purified by glutathione-affinity; GST-MDM2<sub>428-C</sub>-His-MDMX<sub>428-C</sub> and GST-RNF2<sub>1-114</sub>-His-BMI1<sub>1-109</sub> were purified by Ni<sup>2+</sup>-NTA chromatography followed by glutathione-affinity; UbcH5B variants were purified by cation exchange and size exclusion chromatography. For ubiquitination assays, mouse Uba1 was expressed from pET23d (Novagen), charged with GST-Ub with 5 mM MgCl<sub>2</sub> and 5 mM ATP for 2h at 4°C and purified by glutathione-affinity chromatography eluted with 20 mM DTT, followed by anion exchange chromatography; His-Ub and <sup>32</sup>P-Ub were prepared as described previously<sup>3</sup>. Ub variants were cloned into pGEX2TK and purified as

described previously. UbcH5B variants were purified by cation exchange chromatography;  $^{32}\text{P}$ -SMAC comprising residues 56-C was expressed from pET23d containing a C-terminal Protein kinase A recognition sequence (RRAVS) and purified by Ni-NTA affinity chromatography followed by size exclusion chromatography. All protein concentrations were determined by Bradford assay<sup>4</sup> with bovine serum albumin as standard and Ub concentration was determined as described previously<sup>5</sup>. Proteins were stored in 25 mM Tris-HCl (pH 7.6), 0.15 M NaCl and 1 mM DTT or 25 mM HEPES (pH 7.0), 0.15 M NaCl and 1 mM DTT at  $-80^{\circ}\text{C}$ .

### Structural determination

The data were integrated with automated XDS<sup>6</sup> and scaled using the CCP4 program suite<sup>7</sup>. BIRC7<sub>239-C</sub>-UbcH5B<sub>RAS</sub>~Ub complex crystals belong to space group P4<sub>3</sub>2<sub>1</sub>2 with two molecules in the asymmetric unit. Initial phases of BIRC7<sub>239-C</sub>-UbcH5B<sub>RAS</sub>~Ub were obtained by molecular replacement with PHASER<sup>8</sup> using PDB 3EB6 (BIRC3 RING-UbcH5B complex) and PDB 3A33 (UbcH5B~Ub) as the search models, respectively. All models were built in COOT<sup>9</sup> and refined using CCP4, CNS<sup>10</sup> and PHENIX<sup>11</sup>.

The structure of BIRC7<sub>239-C</sub>-UbcH5B<sub>RAS</sub>~Ub (Chains A-F) was refined at a resolution of 2.18 Å and the final model contained two copies of UbcH5B (Chain A residues 2-147 and Chain D residues 2-147), BIRC7<sub>239-C</sub> (Chain B residues 242-298 and Chain E residues 242-298), Ub (Chain C residues 1-76 and Chain F residues 2-76). Residues with poor sidechain electron density were built as Ala. Details of the refinement statistics are shown in **Table 2**. All figure models were generated using PYMOL (Schrödinger).

### Single turnover kinetics of di-Ub formation

UbcH5B was charged in a buffer containing 50 mM HEPES (pH 7.5), 50 mM NaCl, 5 mM MgCl<sub>2</sub>, 5 mM ATP, 1 mM DTT, 0.3 U ml<sup>-1</sup> inorganic pyrophosphatase, 0.3 U ml<sup>-1</sup> creatine kinase, 5 mM creatine phosphate, mouse UBA1 (2.5 μM), <sup>32</sup>P-Ub variant (130 μM) and UbcH5B (66 μM) for 15 min at 23 °C. Charging was stopped by incubating the reaction with 0.25 U apyrase (Sigma) and 30 mM EDTA for 5 min at 23 °C. Different amounts of UbcH5B~<sup>32</sup>P-Ub variants were then added to a reaction containing 50 mM HEPES (pH 7.5), 50 mM NaCl, His-Ub (820 μM; final concentration) and BIRC7<sub>239-C</sub> or BIRC3<sub>541-C</sub> variants. Final E3 concentrations are indicated in **Supplementary Fig. 6a,f**. Reactions were quenched with 2X SDS loading buffer containing 200 mM DTT at 30 s, resolved by SDS-PAGE, dried and exposed to a phosphorimager. Under these conditions, less than 15% of UbcH5B~<sup>32</sup>P-Ub variants were transferred to His-Ub, thus representing initial rate. In addition there was no observable autoubiquitination of BIRC3<sub>541-C</sub> variants and BIRC7<sub>239-C</sub>. Di-Ub bands were quantified using ImageQuant (GE Healthcare). Control reactions lacking E3 at each UbcH5B~<sup>32</sup>P-Ub variant concentration were performed for background subtraction during quantification. All reported kinetic parameters were determined by fitting at least two independent datasets to the Michaelis-Menten equation using SigmaPlot 8.0 (Systat Software Inc.).

## References

1. Reverter, D. & Lima, C.D. Insights into E3 ligase activity revealed by a SUMO-RanGAP1-Ubc9-Nup358 complex. *Nature* **435**, 687-92 (2005).
2. Mace, P.D. *et al.* Structures of the cIAP2 RING domain reveal conformational changes associated with ubiquitin-conjugating enzyme (E2) recruitment. *J Biol Chem* **283**, 31633-40 (2008).
3. Dou, H., Buetow, L., Hock, A., Sibbet, G.J., Vousden, K.H. & Huang, D.T. Structural basis for autoinhibition and phosphorylation-dependent activation of c-Cbl. *Nat Struct Mol Biol* **19**, 184-92 (2012).
4. Bradford, M.M. A rapid and sensitive method for the quantitation of microgram quantities of protein utilizing the principle of protein-dye binding. *Anal Biochem* **72**, 248-54 (1976).
5. Bohnsack, R.N. & Haas, A.L. Conservation in the mechanism of Nedd8 activation by the human AppBp1-Uba3 heterodimer. *J Biol Chem* **278**, 26823-30 (2003).
6. Kabsch, W. Xds. *Acta Crystallogr D Biol Crystallogr* **66**, 125-32 (2010).
7. Collaborative Computational Project, N. "The CCP4 Suite: Programs for Protein Crystallography". *Acta Cryst.* **D50**, 760-763 (1994).
8. Storoni, L.C., McCoy, A.J. & Read, R.J. Likelihood-enhanced fast rotation functions. *Acta Crystallogr D Biol Crystallogr* **60**, 432-8 (2004).
9. Emsley, P. & Cowtan, K. Coot: model-building tools for molecular graphics. *Acta Crystallogr D Biol Crystallogr* **60**, 2126-32 (2004).
10. Brunger, A.T. *et al.* Crystallography & NMR system: A new software suite for macromolecular structure determination. *Acta Crystallogr D Biol Crystallogr* **54**, 905-21 (1998).
11. Adams, P.D. *et al.* PHENIX: building new software for automated crystallographic structure determination. *Acta Crystallogr D Biol Crystallogr* **58**, 1948-54 (2002).
